# Supplementary material for: Modeling the Emergence of Contact Languages
Source: PLOS journal article supplement (doi:10.1371/journal.pone.0120771), 2015-04-15
Supplement: S1 (10.1371/journal.pone.0120771.s001) [file journal.pone.0120771.s001.pdf › journal.pone.0120771.s001.pdf]

# Modeling the emergence of contact languages

Supporting Information

Francesca Tria<sup>1</sup>, Vito D. P. Servedio<sup>2,3</sup>,  
Salikoko S. Mufwene<sup>4</sup> & Vittorio Loreto<sup>3,1,5</sup>

April 2, 2015

<sup>1</sup> Institute for Scientific Interchange (ISI), Via Alassio 11/c, 10126 Torino, Italy

<sup>2</sup> Institute for Complex Systems (ISC-CNR), Via dei Taurini 19, 00185 Roma, Italy

<sup>3</sup> Sapienza University of Rome, Physics Dept., Piazzale Aldo Moro 2, 00185 Roma, Italy

<sup>4</sup> Univ. of Chicago, Dept. of Linguistics, 1010 E. 59th Street, Chicago, IL 60637, USA

<sup>5</sup> SONY-CSL, 5, Rue Amyot, 75005, Paris, France

## 1 Analysis of the model parameters

In this article we study the dependence of the model predictions on the parameters  $\epsilon$ ,  $\gamma$  and  $\delta$ . We found that the segregation regime, parametrized by  $\epsilon$ , plays an important role in the emergence of creoles languages. In particular, we found that for States near the line separating the two regions where Creoles emerged or did not, the model predictions vary accordingly to the hypothesized strength of the segregation regime. Higher contact between Europeans and Bozal Slaves disfavor the emergence of a creole language, favoring the acquisition of the European lexifier by Mulattos and Bozal Slaves (see Fig. A in this S1 file).

The transition line between the region where Creole or European dominate is conversely left unaltered by changing the parameter  $\delta$ , representing the level of multilingualism of African languages (see Fig. B in this S1 file). However, when a single African language  $A$  is hypothesized to be understood by the majority of African slaves, a second transition appears, dividing a region into where the model predicts the emergence of creoles and a region where the model predicts that the African language  $A$  is adopted by Mulattos and Bozal slaves (see Fig. B in this S1 file).

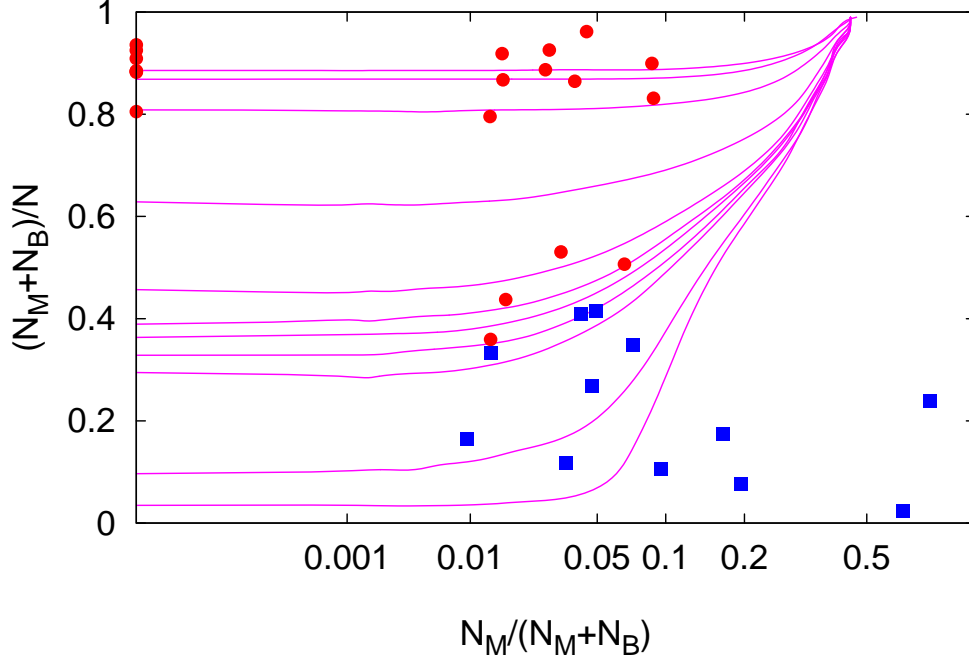

Figure A: **Dependence of the model predictions on the probability  $\epsilon$  of interaction between Europeans and Bozal slaves.** We report the division line between a region where the model predicts creole emergence (above the line) and where the model predicts no creole emergence and E as the unique shared language (below the line). The different lines are for the values of  $\epsilon$ , from bottom to top: 0.01, 0.02, 0.05, 0.06, 0.07, 0.08, 0.1, 0.2, 0.5, 0.8, 1.0. All the other parameters of the model are set as in the main text:  $\gamma = 0.8$  and  $\delta = 0.1$ . Red points indicate States where Creole did emerge, while blue squares indicate States where Creole did not emerge (see also the main text).

However this latter situation does not represent the historical reality in the colonies (please also see the discussion in the next section). Finally, the actual value of the  $\gamma$  parameter, provided that it is not too low, does not affect the model predictions (see Fig. C in this S1 file). In sum, while the model shows some dependence on the two parameters related to the specific contact ecology considered, thus allowing for more thorough investigation of particular historical situations, its predictions are largely stable against the choice of the model's parameters.

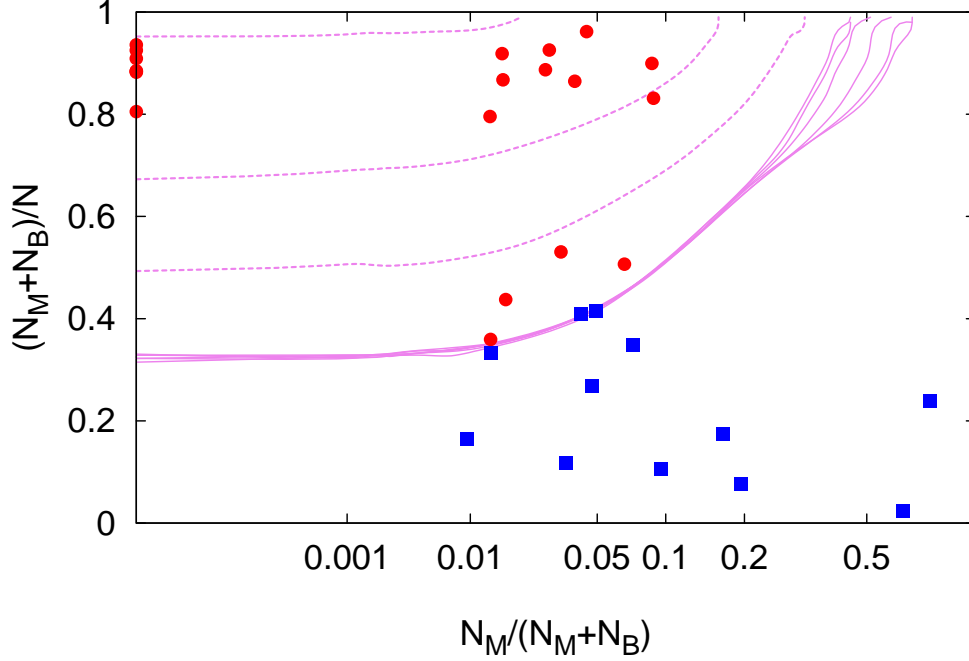

Figure B: **Dependence of the model predictions on the probability  $\delta$  that two individuals speaking  $A$  will understand each other.** We report the results for the values of  $\delta$ : 0.05, 0.1, 0.2, 0.5, 0.8, 1.0. Here, for some values of  $\delta$ , we observe two different transitions lines. Common to all the  $\delta$ -values is the transition from a region where Creole emerged (above the solid line) and where  $E$  remains as the unique spoken language (below the solid line). Further, for the higher values of  $\delta$ , we observe a second transition, from the region where Creole emerged (below the dashed line), and a region where  $A$  is retained as the language of Mulattos and Bozal slaves (above the dashed line). Dashed lines correspond to the  $\delta$  values, from top to bottom: 0.5, 0.8, 1.0. Again, red points indicate States where Creole did emerge, while blue squares indicate States where Creole did not emerge. The other parameters values are  $\epsilon = 0.06$  and  $\delta = 0.1$ .

## 2 Robustness of the model's predictions

For the sake of completeness, we report here the predictions of our modeling scheme for different values of the model parameters, when taking as initial con-

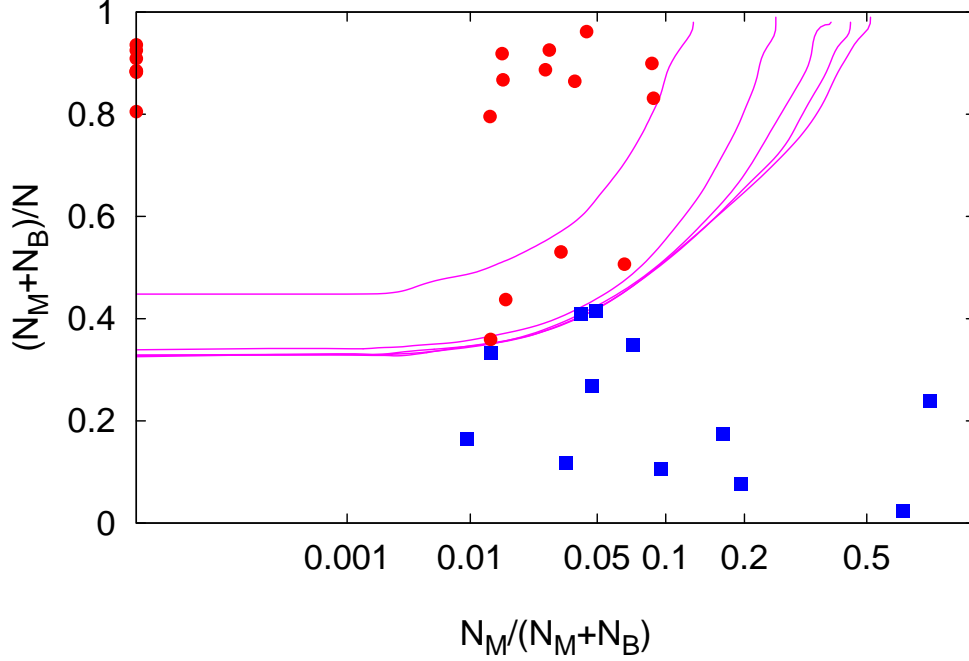

Figure C: **Dependence of the model's predictions on the probability  $\gamma$  of inventing a new language  $C$  out of  $A$  and  $E$ .** We report the division line between a region where the model predicts creole emergence (above the line) and where the model predicts no creole emergence and  $E$  as the unique shared language (below the line). The different lines are for the values of  $\gamma$ , from top to bottom: 0.2, 0.4, 0.6, 0.8, 1.0. The other parameters of the model are set as in the main text:  $\epsilon = 0.06$  and  $\delta = 0.1$ . Red points indicate States where Creole did emerge, while blue squares indicate States where Creole did not emerge.

ditions the actual population composition of each individual State, as reported in the census data discussed in the main text. In particular, we performed a set of stochastic simulations with the following set of parameters:  $\gamma \in \{0.3, 0.6, 0.8, 1.0\}$ ;  $\epsilon \in \{0.00, 0.01, 0.05, 0.10, 0.20, 0.40\}$ ;  $\delta \in \{0.1, 0.2, 0.4\}$  for a total of 96 simulations per State. In addition, since the initial date of the creolization process cannot be fixed with fine precision, we studied different initial conditions when census data at different years were available. Fig. D in this S1 file illustrates the predictions of our modeling scheme for the States considered. The idea is that

the creolization in those States that lie at the proximity of the transition band of Fig.1 of the main text should be more susceptible to parameter variability and they deserve a more careful analysis that also takes into account their particular population composition as well as other historical elements. It is important to remark how the transition band of Fig. 1 of the main text has been drawn using the same set of parameter values, while it is reasonable to imagine that not all the States are well represented by the same set of parameters. The next section is devoted to a more detailed analysis of individual States.

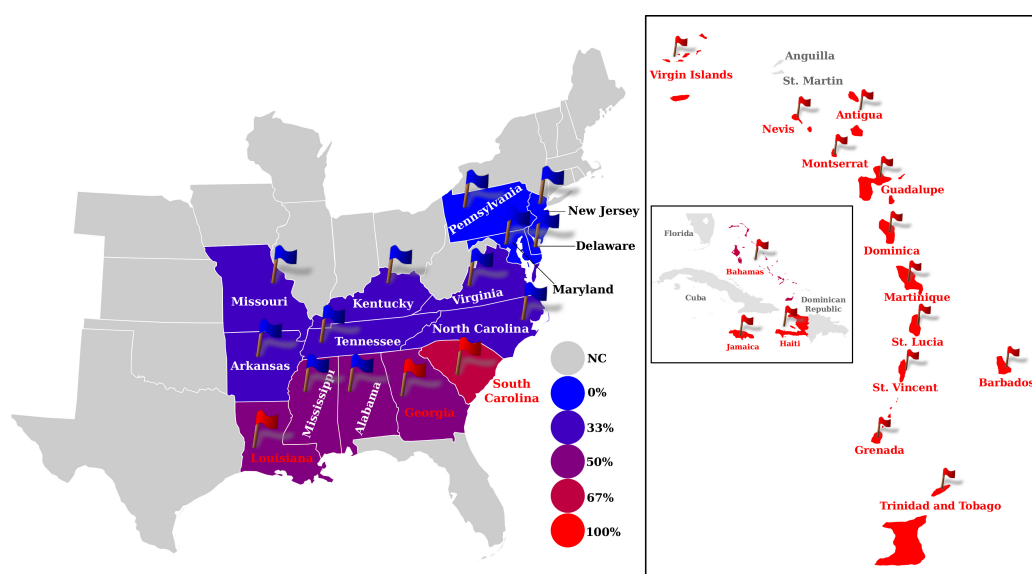

Figure D: **Prediction of the emergence of Creole in US states and the Caribbean.** The map reports, for each US State investigated, the comparison between the model's prediction of the emergence or non-emergence of Creole and the actual situation. The likelihood of the emergence of Creole is encoded in the color each state is represented with, by using the color code reported in the legend. The flag colors mark whether a Creole language emerged (red flag) or not (blue flag), while States are colored according to the likelihood of Creole emergence as predicted by the model. This map was produced with the *Inkscape* open source software (<http://www.inkscape.org/>).

### 3 The model’s results for individual States

In this section we go deeper in analyzing the model’s predictions in individual States. For the sake of clarity we display again here Fig. 1 of the main text as Fig. E in this S1 file.

Creolization in the States that lie at the border of the two regions, e.g., Alabama (1820), Louisiana (1850), Georgia (1790), Virginia (1790), Mississippi (1800), appears to be more dependent upon the choice of parameters than, for example, Barbados (1786) and Missouri (1810), which in contrast were found to be more stable and lie far from the transition line. More explicitly, no particular parameter combination suggests linguistic creolization in Missouri (1810). This is a consequence of the fact that its colonial population had a White majority. Unlike in coastal South Carolina, where race segregation was introduced early in the 18th century, the Missouri population was not racially segregated until the late 19th century, when the Jim Crow laws were institutionalized. Creolization has typically been associated with large plantation settlement colonies on which the African slaves were the overwhelming majority early in the colonial history and race segregation was introduced concurrently [1, 2, 3, 4, 5].

All parameter combinations except those with  $\delta > 0.8$  suggest creolization development in Barbados (1786). According to our model, if we let the Bozals of Barbados speak the same African language ( $\delta = 1$ ), they would preserve it despite the pressure to adopt the European language and creolize. This special situation of Bozals speaking the same African idiom has never been reported for any colonies. Instead, there were cases where populations from particular parts of Africa represented an important part of the slave population at a particular time, and they influenced the way the Creole developed, e.g. Berbice Dutch in Guyana, Sranan and Saramaccan in Surinam, Haitian Creole (Saint Domingue), and perhaps Jamaican Creole [6, 7, 8, 9]. In all cases, we should bear in mind that societal multilingualism among African slaves generally disfavored the retention of a substrate language as a vernacular, especially in ecologies where race segregation was institutionalized later in their history, in the late 19th century, as in the cotton- and tobacco-plantation States. Thus, Alabama’s Bozals were ecologically driven towards adopting the dominant European language. More generally, in the States with a high Black dominance our model with  $\delta \simeq 1$  predicts that the Bozals’ African language would prevail, suggesting that the heterogeneity of African languages among Bozals may have played a major role in the process of creolization.

Let us now examine specific examples more closely.

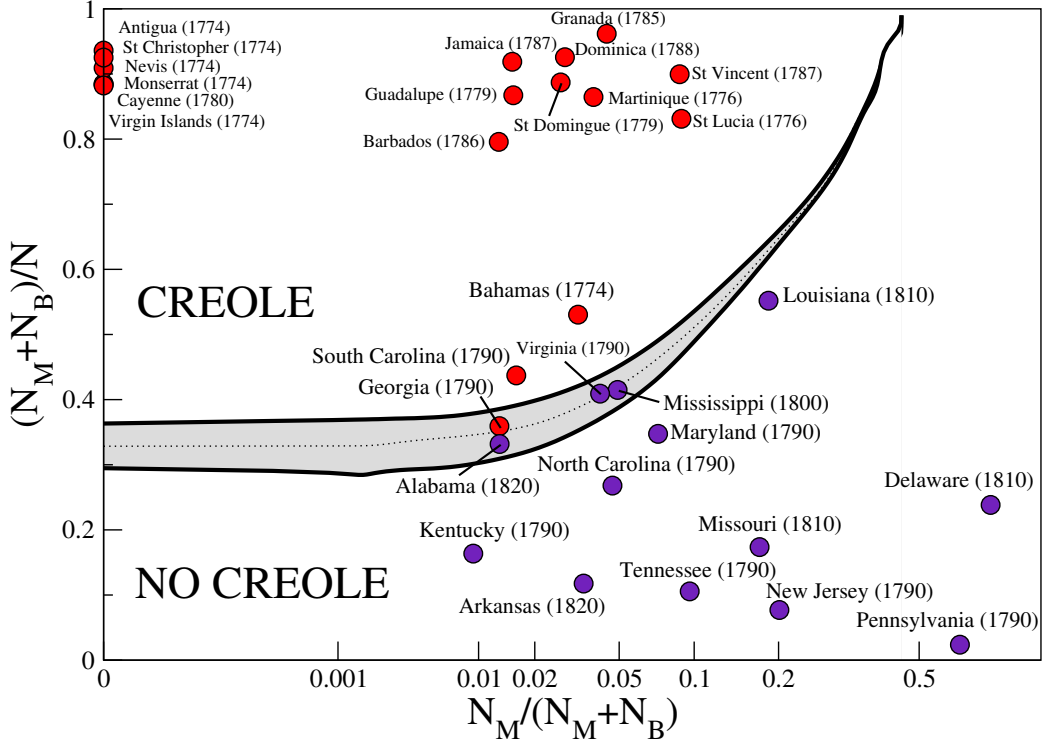

Figure E: **Clustering in the Creole formation process.** As in Fig. 1 of main text: Points are the projection of the census data (See Tables A-D in this Supporting Information S1) in the plane  $(N_M/(N_B + N_M), (N_M + N_B)/(N_M + N_B + N_{Eu}))$ . Red circles mark counties where a Creole language emerged while purple ones identify States where a Creole language historically did not emerge. The gray strip is the outcome of our modeling scheme and separates the regions where respectively Creole  $C$  (above the strip) and European  $E$  (below the strip) represent the dominant language (i.e., spread among more than the 80% of the population) in the Mulattos and Bozal populations in the asymptotic states of the model. The two black curves delimiting the gray stripe and the dashed line in the middle are obtained by simulations performed with the same parameters  $\gamma = 0.8$ ,  $\delta = 0.1$  and  $N = N_M + N_B + N_{Eu} = 10000$ , with  $\epsilon$  ranging from 0.05 (bottom black curve) to 0.07 (upper black curve), passing through 0.06 (dashed curve). The horizontal axis has been artificially expanded by a power 0.2.

**Virginia** The population distribution was very uneven in Virginia at the beginning of the 19th century. Fig. F in this S1 file reports the projection of the census data. It suggests that coastal counties (green circles) display a larger likelihood for the emergence of a creole language. To date nobody has suggested that a creole developed in the area. However, it was reported to Salikoko Mufwene in the late 1980s that African Americans in rural and marshy coastal Virginia speak a variety of English different from African American English (AAVE) spoken in the hinterland and closer to Gullah. Future field research will shed light on this question.

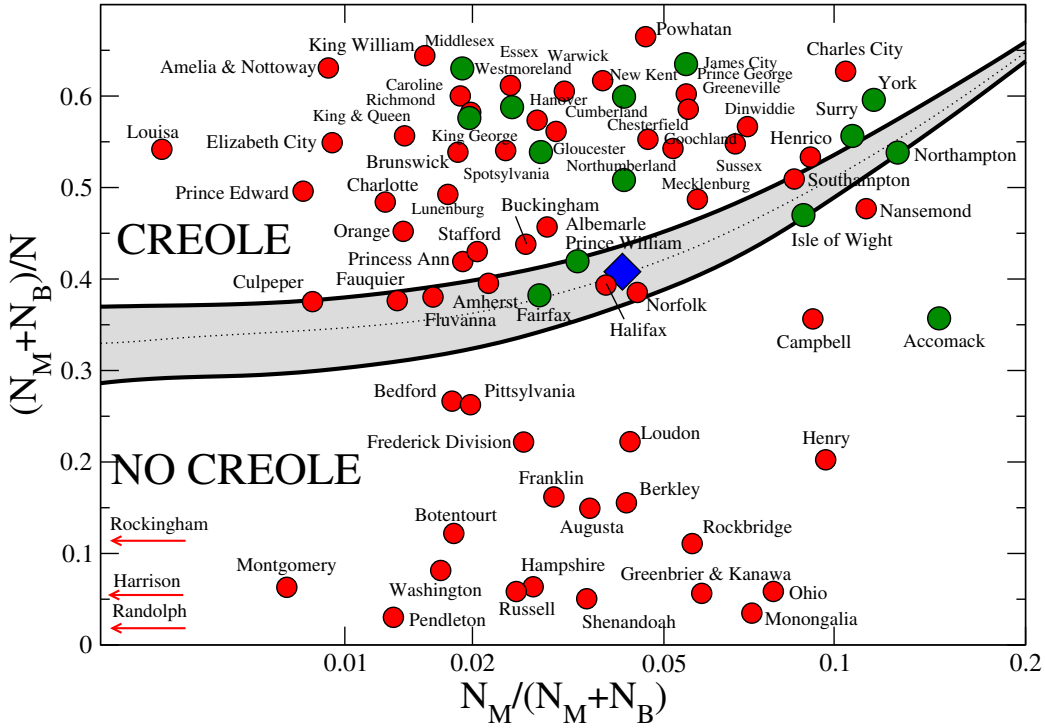

Figure F: **Detailed analysis of Virginia counties in 1790.** Points are the projection of the census data (See Table E of this S1 file) in the plane  $(N_M / (N_B + N_M), (N_M + N_B) / (N_M + N_B + N_{Eu}))$ . Green and red circles mark counties lying on the coast and in the hinterland, respectively. The large blue diamond refers to the Virginia State as a whole. The three counties at the bottom left lie at a zero  $x$  value. The gray stripe and axes definitions are the same of Fig. E of this S1 file.

Fig. G in this S1 file illustrates the model's predictions for the emergence of a



creole language in Virginia's counties and parishes of 1790.

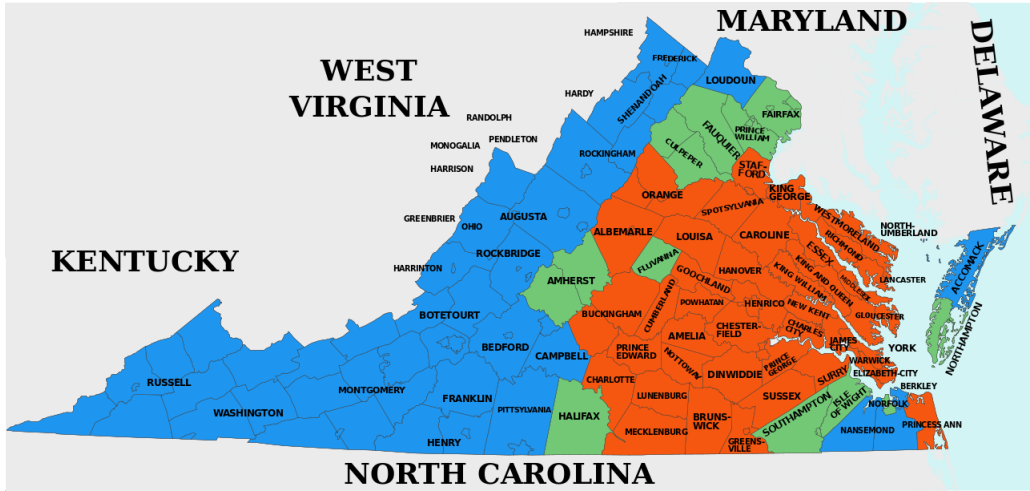

Figure G: **Detailed analysis of Virginia counties.** Here we report the predictions about the emergence of a creole language in those counties and parishes of Virginia for which census data collected in year 1790 are available. The blue counties lie below the transition stripe shown in Fig. F of this S1 file so that our model predicts that Creole did not emerge. On the other hand, orange counties lie above the transition stripe where our model predicts the formation of Creole. The green counties lie in the gray transition region. Although modern county boundaries are shown, only the labels corresponding to the counties existing in year 1790 are displayed. This map was produced with the *Inkscape* open source software (<http://www.inkscape.org/>).

**South Carolina and Georgia** The population distribution was very uneven also in South Carolina and Georgia. Fig. H and I in this S1 file report the census, county by county in those two states. They make evident the strong heterogeneity in the relative populations of Whites, Free Blacks and Bozal Blacks across the different counties. At the same time a larger likelihood for the emergence of a creole language is observed in coastal counties, where Gullah emerged. A summary of the model's predictions for the emergence of a creole language in South-Carolina and Georgia counties of 1790 were already presented in Fig. 4 of the main text.

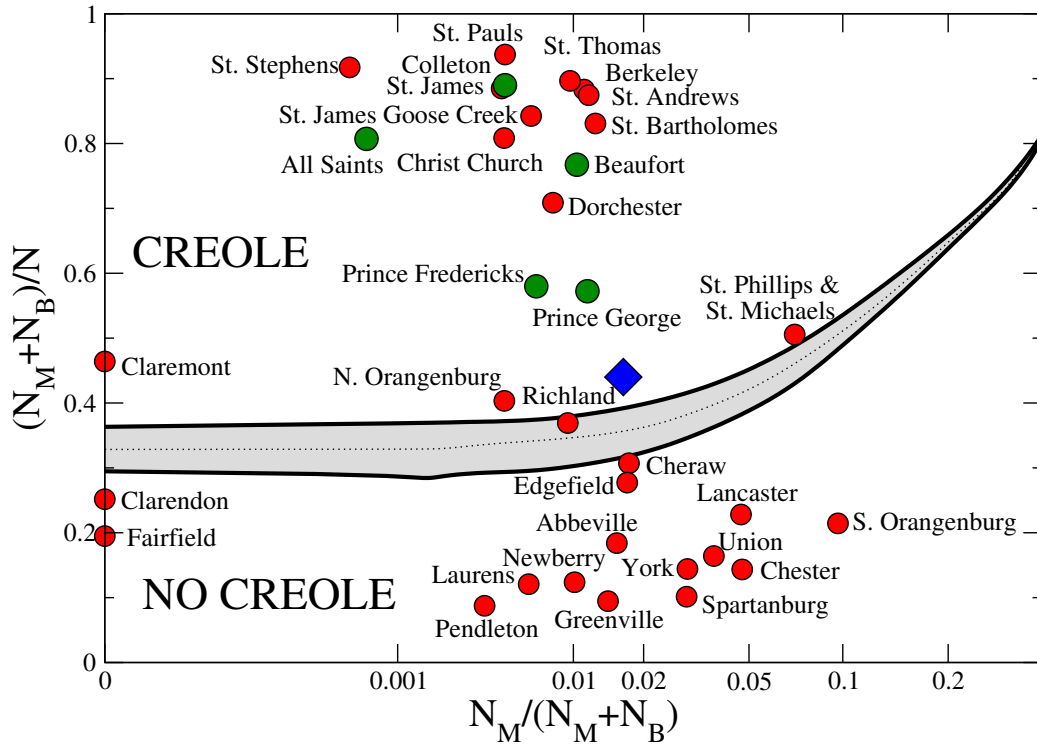

Figure H: **Detailed analysis of South Carolina counties in 1790.** Points are the projection of the census data (See Table H in this S1 file) as in Fig. F of this S1 file, the large blue diamond referring to the South Carolina State as a whole. Green and red circles mark counties lying on the coast and in the hinterland, respectively. The grey stripe and axes definitions are the same of Fig. E of this S1 file.

**Louisiana** Louisiana represents an interesting case since we have access to census data regarding several decades, namely, 1810-1820-1830-1840-1850. In Fig. J (top) of this S1 file we display those data and it turns out that the likelihood for the emergence of the Creole seems to increase with time, i.e., the relative population sizes of Whites, Free Blacks and Bozal Blacks of 1850 lies above the transition line while in 1810 it lies below. We speculate that the lack of census data about 18th century, when Louisiana was a French colony, distorts the fact that large French sugarcane plantations existed then that produced a French creole. Also, although the 19th-century census figures indicate a population increase, correlated largely with the introduction of the cotton industry to the State, then part

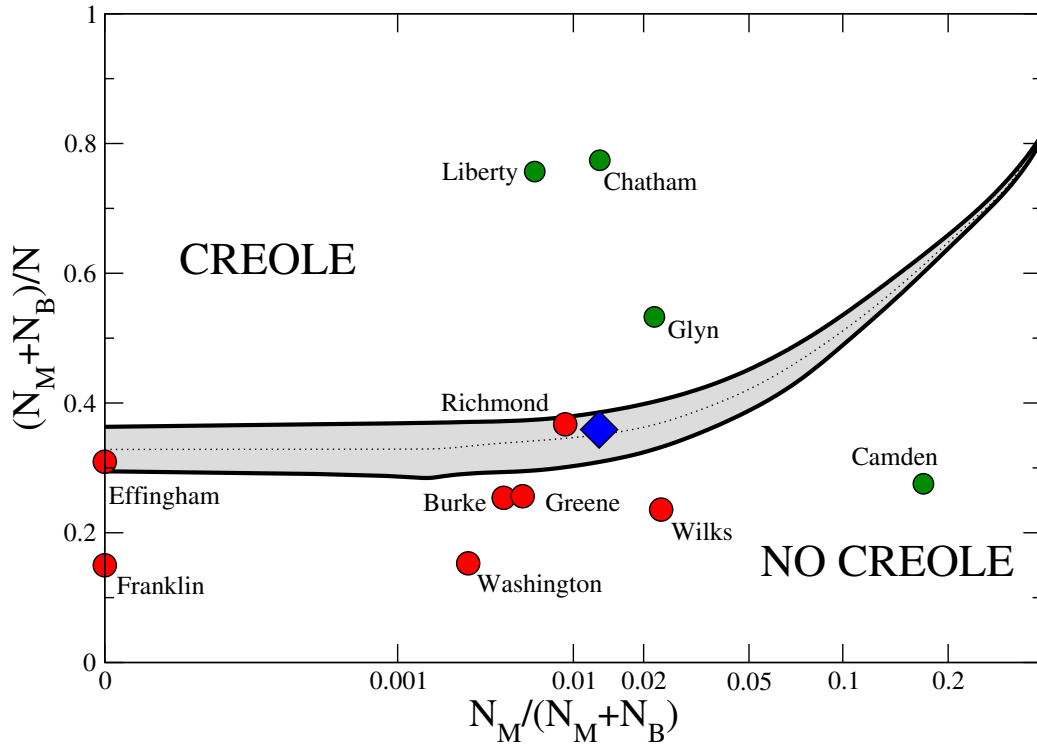

Figure I: **Detailed analysis of Georgia counties in 1790.** The points are the projection of the census data (See Table G in this S1 file) as in Fig. F of this S1 file, the large blue diamond referring to the Georgia State as a whole. Green and red circles mark counties lying on the coast and in the hinterland, respectively. The gray stripe and axes definitions are the same of Fig. E of this S1 file.

of the expanding United States, they do not point out an important difference in population structure. The cotton plantations were smaller in size and less densely populated compared to sugarcane plantations and rice fields (in the case of South Carolina and Georgia); generally they produced closer approximations of the European language, AAVE in the United States. We should also keep in mind that there were officially no more Bozal slaves after the abolition of the slave trade in the early 19th century and certainly not after the abolition of slavery in the mid-19th century. The slaves that came to the cotton plantations of Louisiana came from other places in the United States, especially Virginia, which made a lot of money from the domestic slave trade. So, these were not Bozal slaves. They came

to Louisiana already speaking an ancestor of AAVE and there was thus no reason for a creole to develop.

This example is very interesting because it demonstrates how our modeling scheme could turn out to be a valid tool to support field works in studies of creolization. For instance different predictions can be tested depending on the demographic composition of the population at the time Creole formation is expected. This implies that before getting to firm conclusions one has to carefully match the modeling scheme with the local historical conditions in order to obtain reasonable estimates of the parameters' values to be used in the model simulations.

**Alabama** A similar argument could be repeated as for Louisiana. The model predicts a likelihood of 50% of Creole emergence in Alabama (see Figs. E and J (top) in this S1 file), where in reality no English creole emerged. This suggests that direct interactions between slaves and Europeans might have been stronger in Alabama (1820) than in Louisiana (1850). The colonial history of the region actually explains this. Although both States were originally part of the much larger French colony of Louisiana up to the late 18th century, Alabama, which had not launched in the sugarcane industry in the 18th century, would develop in the 19th century primarily on the cotton cultivation economy, while Louisiana would continue its sugarcane cultivation until the middle of the 19th century, before letting the cotton industry prevail afterwards. Unlike sugarcane plantations, which had slave-majority laborers, the cotton plantations were smaller, as explained above, and depended on white-majority laborers. As explained in Mufwene [10, 5], cotton plantations in the United States produced no creoles, unlike rice fields in coastal South Carolina and Georgia, and the sugarcane plantations of the Caribbean. Unsurprisingly, no English creoles emerged in Alabama and Louisiana. That is, cotton cultivation in the United States, associated with English, produced no Creole, whereas sugarcane cultivation, associated with the French colonization and thriving before the Louisiana Purchase (1803), produced a French Creole. We must remember in the particular case of Louisiana that two different economic cultures coexisted and competed with each other for a while in the history of this State; and affected the evolution of the two colonial languages, English and French, in different ways.

**Mississippi** In Mississippi too, while eventually no Creole developed, the present model suggests that the likelihood of its formation grows in time (Fig. J (top) in this S1 file). Comparing the census data of Mississippi with those of South Car-

olina (as both have comparable black majorities after 1840), one may wonder why Mississippi did not produce a Creole, while South Carolina did. There are again many reasons for this differential evolution. Coastal South Carolina had Black majority in the early 18th century already (1720-1740) [11]. Although the proportions would shift gradually in the 19th century, coastal South Carolina maintained its Black majority until the mid-20th century and has maintained Gullah to date, the English creole that developed in its rice fields in the 18th century. During the 18th century, Mississippi was a French colony, sparsely populated; and its main economy was fur trade. When it shifted to agricultural economy, after being incorporated in the United States in 1817, it developed cotton plantations, which were smaller and required fewer laborers than rice fields and sugarcane plantations, as explained above. (Many of its slaves also came from cotton and tobacco plantation States, including Virginia, which produced no creoles either.)

Regarding its demographics, Mississippi became comparable to Virginia, with its tobacco plantations. The higher proportion of Blacks in Mississippi, concentrated along rivers and in the Delta area, is comparable to that of Virginia in the orange-shaded areas in the map of Fig. G in this S1 file, where more basilectal Gullah-like varieties of AAVE (in the opinion of some native speakers) appear to have developed. Note also that overall, South Carolina was more densely populated than Mississippi. Although the proportion of South Carolina's slave population kept decreasing in the 19th century, the slave population remained the overwhelming majority in the coastal areas, because Whites also avoided them, as they consisted of marshes and were infested with malaria. Race segregation was also institutionalized earlier in coastal South Carolina, in 1720, unlike in Mississippi, in the late 19th century. According to data cited by Wikipedia (checked on December 24th, 2013), the Mississippi enslaved population comprised 436,631 in 1860, or 55% of the State's total of 791,305. Typically, the territories that developed a Creole reached the slave majority early in the histories of the colonies and implemented race segregation concurrently!

There are indeed several other parameters that modelings of differential language evolution will have to factor in, although ours, based on census data, appears to have approximated that history quite well. Our scheme has the merit of raising pertinent issues that ask for the kinds of explanations that we have also provided in our narrative. We have generally learned that demographics applied indiscriminately to overall States or colonies sometimes lead to inaccurate predictions of where we can expect a Creole to have emerged. Indeed, where the modeling predictions and reality do not match, we are prompted to look into history to explain these discrepancies.

## References

- [1] Mufwene SS (2001) *The Ecology of Language Evolution*. Cambridge: Cambridge University Press.
- [2] Mufwene SS (2005) *Créoles, écologie sociale, évolution linguistique*. Paris: L'Harmattan.
- [3] Mufwene SS (2008) *Language Evolution Contact, Competition and Change*. Continuum.
- [4] Schneider EW (1995) Black-white language contact through the centuries: Diachronic aspects of linguistic convergence or divergence in the united states of america. In: Fisiak J, editor, *Linguistic Change under Contact Conditions*, Berlin: Mouton de Gruyter. pp. 237–252.
- [5] Mufwene SS ((to appear)) The english origins of african american vernacular english: What edgar schneider has taught us. In: Hoffmann T, Kauzsch A, Huber M, Buschfeld S, editors, *Festschrift to Edgar W. Schneider*, Elsevier.
- [6] Aboh E (2006) Complementiation in saramaccan and gungbe: the case of c-type modal particles. *Natural language and linguistic theory* 24: 1–55.
- [7] Lefebvre C (1998) *Creole genesis and the acquisition of grammar: The case of Haitian creole*. Cambridge: Cambridge University Press.
- [8] Kouwenberg S (1994) *A Grammar of Berbice Dutch Creole*. Berlin: Mouton de Gruyter.
- [9] Alleyne MC (1996) *Syntaxe historique créole*. Hommes et sociétés. Paris: Editions Karthala.
- [10] Mufwene SS (2009) The indigenization of english in north america. In: Hoffmann T, Siebers L, editors, *World Englishes - Problems, Properties, Prospects: Selected Papers from the 13th IAWC Conference*. Amsterdam: Benjamins, pp. 353–368.
- [11] Wood PH (1974) *Black Majority: Negroes in Colonial South Carolina from 1670 through the Stono Rebellion*. New York: Knopf.

|                | Year | Europeans | Free Colored | Blacks | Creole | European |
|----------------|------|-----------|--------------|--------|--------|----------|
| Georgia        | 1790 | 52886     | 398          | 29264  | 50%    | 50%      |
|                | 1800 | 101678    | 1019         | 59404  | 50%    | 50%      |
|                | 1810 | 145414    | 1801         | 105218 | 50%    | 50%      |
|                | 1820 | 189566    | 1763         | 149654 | 50%    | 50%      |
|                | 1830 | 296806    | 2486         | 217531 | 50%    | 50%      |
|                | 1840 | 407695    | 2753         | 289944 | 50%    | 50%      |
|                | 1850 | 521572    | 2931         | 381682 | 50%    | 50%      |
| Louisiana      | 1810 | 34311     | 7585         | 34660  | 25%    | 75%      |
|                | 1820 | 73383     | 10476        | 69064  | 29%    | 71%      |
|                | 1830 | 89441     | 16710        | 109588 | 44%    | 56%      |
|                | 1840 | 158457    | 25502        | 168452 | 44%    | 56%      |
|                | 1850 | 255491    | 17462        | 244809 | 50%    | 50%      |
| South Carolina | 1790 | 140178    | 1801         | 107094 | 50%    | 50%      |
|                | 1800 | 196255    | 3185         | 146151 | 50%    | 50%      |
|                | 1810 | 214196    | 4554         | 196365 | 63%    | 38%      |
|                | 1820 | 237440    | 6826         | 258475 | 67%    | 33%      |
|                | 1830 | 257863    | 7921         | 315401 | 67%    | 33%      |
|                | 1840 | 259084    | 8276         | 327038 | 67%    | 33%      |
|                | 1850 | 274563    | 8960         | 384984 | 67%    | 33%      |

Table A: Census data relative to the populations of Europeans (Whites), Free Colored (Mulattos) and Blacks (Bozals) in those states that eventually developed the creole language. The last two columns show the result of the model stochastic simulation with the set of parameters described in the text. In the evaluation of the percentage figures the cases with  $\delta = 1$  (Bozals speaking the same African language) were left out since they all resulted in the adoption of the language B as their vernacular. The single simulation is never ambiguous: either the whole (almost) Mulatto and Bozal populations end up with the Creole language or with the European, or with the African one in case  $\delta = 1$ .

|                | <b>Year</b> | <b>Europeans</b> | <b>Free Colored</b> | <b>Blacks</b> | <b>Creole</b> | <b>European</b> |
|----------------|-------------|------------------|---------------------|---------------|---------------|-----------------|
| Antigua        | 1774        | 2590             | 0                   | 37808         | 100%          | 0%              |
| Bahamas        | 1774        | 2052             | 77                  | 2241          | 64%           | 36%             |
| Barbados       | 1786        | 16167            | 838                 | 62115         | 100%          | 0%              |
| Cayenne        | 1780        | 1385             | 0                   | 10539         | 100%          | 0%              |
| Dominica       | 1788        | 1236             | 445                 | 14967         | 100%          | 0%              |
| Granada        | 1785        | 996              | 1115                | 23926         | 100%          | 0%              |
| Guadalupe      | 1779        | 13261            | 1382                | 85327         | 100%          | 0%              |
| Jamaica        | 1787        | 23000            | 4093                | 256000        | 100%          | 0%              |
| Martinique     | 1776        | 11619            | 2892                | 71286         | 100%          | 0%              |
| Montserrat     | 1774        | 1300             | 0                   | 10000         | 100%          | 0%              |
| Nevis          | 1774        | 1000             | 0                   | 10000         | 100%          | 0%              |
| St Christopher | 1774        | 1900             | 0                   | 23462         | 100%          | 0%              |
| St Domingue    | 1779        | 32650            | 7055                | 249098        | 100%          | 0%              |
| St Lucia       | 1776        | 2397             | 1050                | 10752         | 97%           | 3%              |
| St Vincent     | 1787        | 1450             | 1138                | 11853         | 100%          | 0%              |
| Tobago         | 1776        | 2397             | 1050                | 10752         | 97%           | 3%              |
| Virgin Islands | 1774        | 1200             | 0                   | 9000          | 100%          | 0%              |

Table B: Same as Table A of this S1 file.



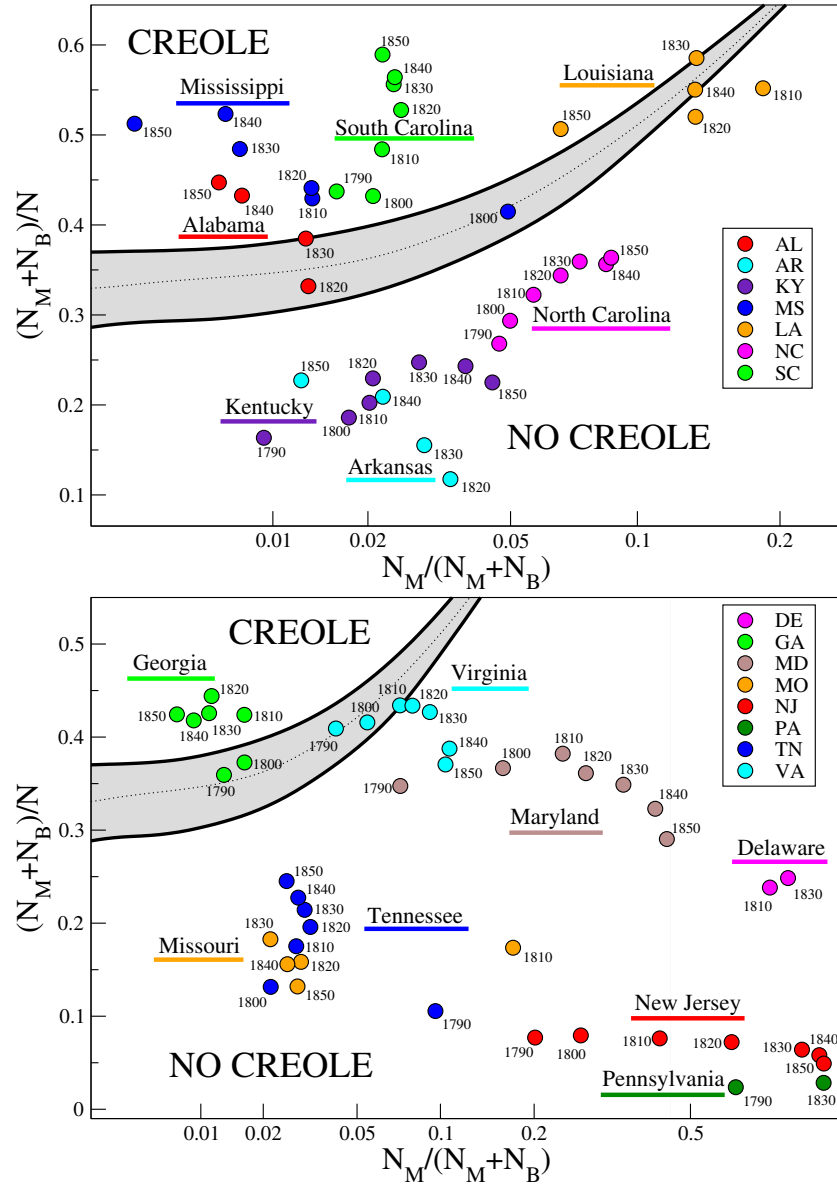

Figure J: **Clustering in the Creole formation process for census data in different decades.** The plot is separated in two figures for the sake of clarity. Both contain the same information for different States: Points are the projection of the census data (See Tables A-D in this S1 file) for different year decades in the plane  $(N_M/(N_B + N_M), (N_M + N_B)/(N_M + N_B + N_{Eu}))$ . The gray stripe and axes definitions are the same of Fig. E of this S1 file.

|             | <b>Year</b> | <b>Europeans</b> | <b>Free Colored</b> | <b>Blacks</b> | <b>Creole</b> | <b>European</b> |
|-------------|-------------|------------------|---------------------|---------------|---------------|-----------------|
| Alabama     | 1820        | 85451            | 571                 | 41879         | 49%           | 51%             |
|             | 1830        | 190406           | 1572                | 117549        | 50%           | 50%             |
|             | 1840        | 335185           | 2039                | 253532        | 50%           | 50%             |
|             | 1850        | 426514           | 2265                | 342844        | 50%           | 50%             |
| Arkansas    | 1820        | 12579            | 59                  | 1617          | 28%           | 72%             |
|             | 1830        | 25671            | 141                 | 4578          | 33%           | 67%             |
|             | 1840        | 77174            | 465                 | 19935         | 33%           | 67%             |
|             | 1850        | 162189           | 608                 | 47100         | 33%           | 67%             |
| Delaware    | 1810        | 55361            | 13136               | 4177          | 0%            | 100%            |
|             | 1830        | 57691            | 15855               | 3222          | 0%            | 100%            |
| Kentucky    | 1790        | 61133            | 114                 | 11839         | 33%           | 67%             |
|             | 1800        | 179871           | 741                 | 40343         | 33%           | 67%             |
|             | 1810        | 324237           | 1713                | 80561         | 33%           | 67%             |
|             | 1820        | 434644           | 2759                | 126732        | 33%           | 67%             |
|             | 1830        | 517787           | 4917                | 165213        | 33%           | 67%             |
|             | 1840        | 590253           | 7317                | 182258        | 33%           | 67%             |
|             | 1850        | 761413           | 10011               | 210981        | 33%           | 67%             |
| Maryland    | 1790        | 208649           | 8043                | 103036        | 33%           | 67%             |
|             | 1800        | 216326           | 19587               | 105635        | 0%            | 100%            |
|             | 1810        | 235117           | 33927               | 111502        | 0%            | 100%            |
|             | 1820        | 260223           | 39730               | 107397        | 0%            | 100%            |
|             | 1830        | 291108           | 52938               | 102994        | 0%            | 100%            |
|             | 1840        | 318204           | 62078               | 89737         | 0%            | 100%            |
|             | 1850        | 417943           | 74723               | 96308         | 0%            | 100%            |
| Mississippi | 1800        | 5179             | 182                 | 3489          | 46%           | 54%             |
|             | 1810        | 23024            | 240                 | 17088         | 50%           | 50%             |
|             | 1820        | 42176            | 458                 | 32814         | 50%           | 50%             |
|             | 1830        | 70443            | 519                 | 65659         | 64%           | 36%             |
|             | 1840        | 179074           | 1366                | 195211        | 67%           | 33%             |
|             | 1850        | 295718           | 930                 | 309878        | 67%           | 33%             |
| Missouri    | 1810        | 17227            | 607                 | 3011          | 0%            | 100%            |
|             | 1820        | 55988            | 317                 | 10222         | 33%           | 67%             |
|             | 1830        | 114795           | 569                 | 25091         | 33%           | 67%             |
|             | 1840        | 323888           | 1574                | 58240         | 33%           | 67%             |
|             | 1850        | 592004           | 2618                | 87422         | 33%           | 67%             |

Table C: Same as Table A of this S1 file but for those States that did not develop the creole language. Continued on Table D of this S1 file.

|                | <b>Year</b> | <b>Europeans</b> | <b>Free Colored</b> | <b>Blacks</b> | <b>Creole</b> | <b>European</b> |
|----------------|-------------|------------------|---------------------|---------------|---------------|-----------------|
| North Carolina | 1790        | 288204           | 4975                | 100572        | 33%           | 67%             |
|                | 1800        | 337764           | 7043                | 133295        | 33%           | 67%             |
|                | 1810        | 376410           | 10266               | 168824        | 33%           | 67%             |
|                | 1820        | 419200           | 14612               | 205017        | 33%           | 67%             |
|                | 1830        | 472843           | 19543               | 245601        | 33%           | 67%             |
|                | 1840        | 484870           | 22732               | 245817        | 33%           | 67%             |
|                | 1850        | 553028           | 27463               | 288548        | 33%           | 67%             |
| Pennsylvania   | 1790        | 424099           | 6537                | 3737          | 0%            | 100%            |
|                | 1830        | 1309900          | 37930               | 403           | 0%            | 100%            |
| Tennessee      | 1790        | 32013            | 361                 | 3417          | 14%           | 86%             |
|                | 1800        | 91709            | 309                 | 13581         | 33%           | 67%             |
|                | 1810        | 215875           | 1317                | 44535         | 33%           | 67%             |
|                | 1820        | 339927           | 2727                | 80117         | 33%           | 67%             |
|                | 1830        | 535746           | 4555                | 141603        | 33%           | 67%             |
|                | 1840        | 640627           | 5524                | 183059        | 33%           | 67%             |
|                | 1850        | 756836           | 6422                | 239459        | 33%           | 67%             |
| Virginia       | 1790        | 442115           | 12766               | 293427        | 49%           | 51%             |
|                | 1800        | 514280           | 20124               | 345796        | 46%           | 54%             |
|                | 1810        | 551534           | 30570               | 392518        | 46%           | 54%             |
|                | 1820        | 603087           | 36889               | 425153        | 46%           | 54%             |
|                | 1830        | 694300           | 47318               | 469757        | 33%           | 67%             |
|                | 1840        | 740858           | 49852               | 419087        | 31%           | 69%             |
|                | 1850        | 894800           | 54333               | 472528        | 31%           | 69%             |
| New Jersey     | 1790        | 169954           | 2762                | 11423         | 0%            | 100%            |
|                | 1800        | 195125           | 4402                | 12422         | 0%            | 100%            |
|                | 1810        | 226861           | 7843                | 10851         | 0%            | 100%            |
|                | 1820        | 257409           | 12460               | 7557          | 0%            | 100%            |
|                | 1830        | 300266           | 18303               | 2254          | 0%            | 100%            |
|                | 1840        | 351588           | 21044               | 674           | 0%            | 100%            |
|                | 1850        | 465569           | 23810               | 236           | 0%            | 100%            |

Table D: Continues Table C of this S1 file.

| <b>County of Virginia</b> | <b>Europeans</b> | <b>Free Colored</b> | <b>Blacks</b> |
|---------------------------|------------------|---------------------|---------------|
| Augusta                   | 9260             | 59                  | 1567          |
| Albemarle                 | 6835             | 171                 | 5579          |
| Accomack                  | 8976             | 721                 | 4262          |
| Amherst                   | 8286             | 121                 | 5296          |
| Amelia & Nottoway         | 6684             | 106                 | 11307         |
| Botetourt & Montgomery    | 9241             | 24                  | 1259          |
| Buckingham                | 5496             | 115                 | 4168          |
| Berkley                   | 16650            | 131                 | 2932          |
| Brunswick                 | 5919             | 132                 | 6776          |
| Bedford                   | 7725             | 52                  | 2754          |
| Cumberland                | 3577             | 142                 | 4434          |
| Chesterfield              | 6358             | 369                 | 7487          |
| Charlotte                 | 5199             | 63                  | 4816          |
| Culpeper                  | 13809            | 70                  | 8226          |
| Charles City              | 2084             | 363                 | 3141          |
| Caroline                  | 6994             | 203                 | 10292         |
| Campbell                  | 4946             | 251                 | 2488          |
| Dinwiddie                 | 6039             | 561                 | 7334          |
| Essex                     | 3543             | 139                 | 5440          |
| Elizabeth City            | 1556             | 18                  | 1876          |
| Fauquier                  | 11157            | 93                  | 6642          |
| Fairfax                   | 7611             | 135                 | 4574          |
| Franklin                  | 5735             | 34                  | 1073          |
| Fluvanna                  | 2430             | 25                  | 1466          |
| Frederick Division        | 15315            | 116                 | 4250          |
| Gloucester                | 6225             | 210                 | 7063          |
| Goochland                 | 4140             | 257                 | 4656          |
| Greeneville               | 2530             | 212                 | 3620          |
| Greenbrier & Kanawa       | 5676             | 20                  | 319           |
| Henrico                   | 5600             | 581                 | 5819          |
| Hanover                   | 6291             | 240                 | 8223          |
| Hampshire                 | 6879             | 13                  | 454           |
| Harrison                  | 2013             | 0                   | 67            |
| Hardy                     | 6556             | 411                 | 369           |
| Halifax                   | 8931             | 226                 | 5565          |
| Henry                     | 6763             | 165                 | 1551          |
| Isle of Wight             | 4786             | 375                 | 3867          |
| James City                | 1519             | 146                 | 2495          |
| King William              | 2893             | 84                  | 5151          |

Table E: Census data regarding the populations of Europeans (Whites), Free Colored (Mulattos) and Blacks (Bozals) in Virginia's counties and parishes in year 1790. Continued on Table F of this S1 file.

| <b>County of Virginia</b> | <b>Europeans</b> | <b>Free Colored</b> | <b>Blacks</b> |
|---------------------------|------------------|---------------------|---------------|
| King and Queen            | 4159             | 75                  | 5143          |
| King George               | 3123             | 86                  | 4157          |
| Lunenburg                 | 4547             | 80                  | 4332          |
| Loudon                    | 14749            | 183                 | 4030          |
| Lancaster                 | 2259             | 143                 | 3236          |
| Louisa                    | 3880             | 14                  | 4573          |
| Mecklenburg               | 7555             | 416                 | 6762          |
| Middlesex                 | 1531             | 51                  | 2558          |
| Monongalia                | 4602             | 12                  | 154           |
| Montgomery & Botetourt    | 12394            | 6                   | 828           |
| Norfolk                   | 8928             | 251                 | 5345          |
| Northampton               | 3181             | 464                 | 3244          |
| New Kent                  | 2391             | 148                 | 3700          |
| Northumberland            | 4506             | 197                 | 4460          |
| Nansemond                 | 4713             | 480                 | 3817          |
| Orange                    | 5436             | 64                  | 4421          |
| Ohio                      | 4907             | 24                  | 281           |
| Prince Edward             | 4082             | 32                  | 3986          |
| Prince William            | 6744             | 167                 | 4704          |
| Prince George             | 3387             | 267                 | 4519          |
| Powhatan                  | 2286             | 211                 | 4325          |
| Pendleton                 | 2378             | 1                   | 73            |
| Pittsylvania              | 8538             | 62                  | 2979          |
| Princess Anne             | 4527             | 64                  | 3202          |
| Richmond                  | 2918             | 83                  | 3984          |
| Randolph                  | 932              | 0                   | 19            |
| Rockingham                | 6677             | 0                   | 772           |
| Russell                   | 3143             | 5                   | 190           |
| Rockbridge                | 5805             | 41                  | 682           |
| Spotsylvania              | 5171             | 148                 | 5933          |
| Stafford                  | 5465             | 87                  | 4036          |
| Southampton               | 6312             | 559                 | 5993          |
| Surry                     | 2762             | 368                 | 3097          |
| Shenandoah                | 9979             | 19                  | 512           |
| Sussex                    | 4771             | 391                 | 5387          |
| Warwick                   | 667              | 33                  | 990           |
| Washington                | 5167             | 8                   | 450           |
| Westmoreland              | 3183             | 114                 | 4425          |
| York                      | 2115             | 358                 | 2760          |

Table F: Continues Table E of this S1 file.

| <b>County of Georgia</b> | <b>Europeans</b> | <b>Free Colored</b> | <b>Blacks</b> |
|--------------------------|------------------|---------------------|---------------|
| Camden                   | 221              | 14                  | 70            |
| Glyn                     | 193              | 5                   | 215           |
| Liberty                  | 1303             | 27                  | 4025          |
| Chatham                  | 2426             | 112                 | 8201          |
| Effingham                | 1674             | 0                   | 750           |
| Richmond                 | 7162             | 39                  | 4116          |
| Burke                    | 7064             | 11                  | 2392          |
| Washington               | 3856             | 2                   | 694           |
| Wilks                    | 24152            | 180                 | 7268          |
| Franklin                 | 885              | 0                   | 156           |
| Greene                   | 4020             | 8                   | 1377          |

Table G: Census data regarding the populations of Europeans (Whites), Free Colored (Mulattos) and Blacks (Bozals) in Georgia's counties and parishes in year 1790.

| <b>County of South Carolina</b> | <b>Europeans</b> | <b>Free Colored</b> | <b>Blacks</b> |
|---------------------------------|------------------|---------------------|---------------|
| Beaufort                        | 4364             | 153                 | 14236         |
| Chester                         | 5881             | 47                  | 938           |
| Claremont                       | 2438             | 0                   | 2110          |
| Clarendon                       | 1790             | 0                   | 602           |
| Fairfield                       | 6138             | 0                   | 1485          |
| Lancaster                       | 4864             | 68                  | 1370          |
| Richland                        | 2479             | 14                  | 1437          |
| York                            | 5652             | 29                  | 923           |
| Berkeley                        | 692              | 60                  | 5170          |
| Colleton                        | 585              | 22                  | 4705          |
| Dorchester                      | 1252             | 25                  | 3022          |
| Christ                          | 445              | 272                 | 11            |
| St. Andrews                     | 370              | 31                  | 2546          |
| St. Bartholomes                 | 2133             | 135                 | 10338         |
| St. James Goose Creek           | 439              | 15                  | 2333          |
| St. James Santee                | 437              | 15                  | 3345          |
| St. Pauls                       | 216              | 15                  | 3202          |
| St. Phillips & St. Michaels     | 8089             | 586                 | 7684          |
| St. Stephens                    | 226              | 1                   | 2506          |
| St. Thomas                      | 397              | 34                  | 3405          |
| Cheraw                          | 7418             | 59                  | 3229          |
| All Saints                      | 429              | 1                   | 1795          |
| Prince Fredericks               | 3418             | 32                  | 4685          |
| Prince George                   | 5031             | 80                  | 6651          |
| Abbeville                       | 7505             | 27                  | 1665          |
| Edgefield                       | 9605             | 65                  | 3619          |
| Greenville                      | 5888             | 9                   | 606           |
| Laurens                         | 8210             | 7                   | 1120          |
| Newberry                        | 8186             | 12                  | 1144          |
| Pendleton                       | 8731             | 3                   | 834           |
| Spartanburg                     | 7907             | 27                  | 866           |
| Union                           | 6430             | 48                  | 1215          |
| N. Oranenburg                   | 6731             | 21                  | 4529          |
| S. Oranenburg                   | 5681             | 149                 | 1402          |

Table H: Census data regarding the populations of Europeans (Whites), Free Colored (Mulattos) and Blacks (Bozals) in South Carolina's counties and parishes in year 1790.
